# Supplementary material for: A novel n–p heterojunction Bi2S3/ZnCo2O4 photocatalyst for boosting visible-light-driven photocatalytic performance toward indigo carmine
Source: Royal Society of Chemistry journal article supplement (doi:10.1039/d3ra02803h), 2023-01-01
Supplement: d3ra02803h1.pdf [file d3ra02803h1.pdf]

Supplementary document for

**A novel n-p heterojunction  $\text{Bi}_2\text{S}_3/\text{ZnCo}_2\text{O}_4$  photocatalysts for boosting visible-light-driven photocatalytic performance toward indigo carmine**

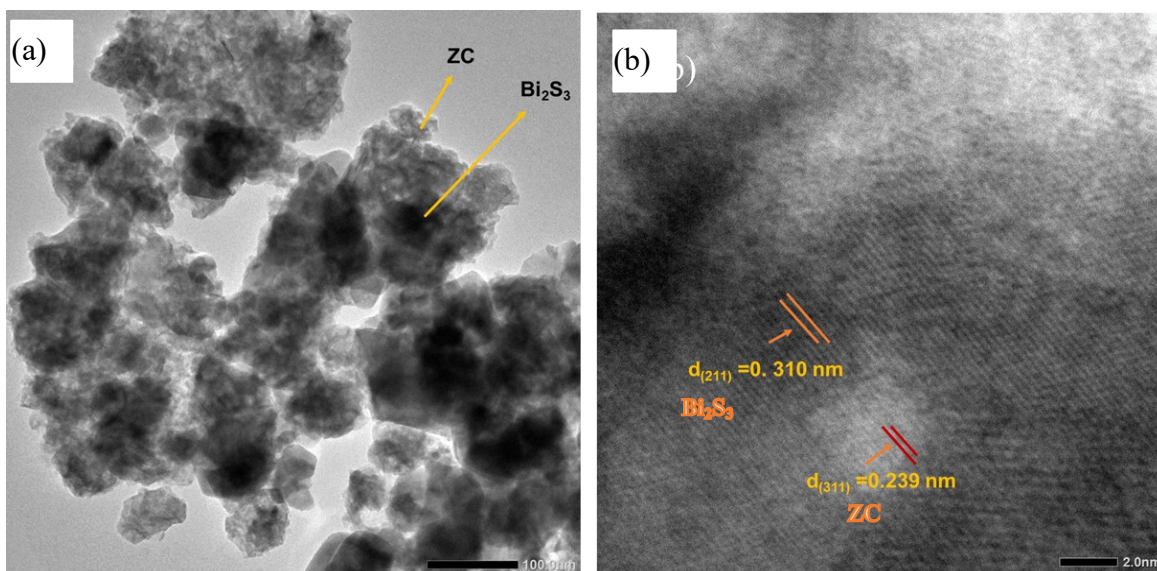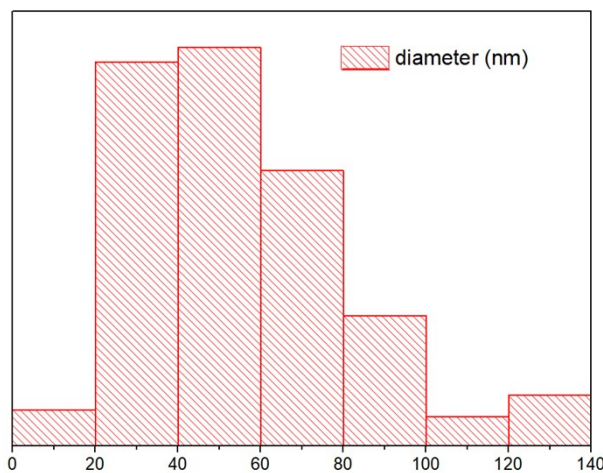

**Figure S1.** TEM (a) and (b) HRTEM, and (c) distribution particles of 12.0 $\text{Bi}_2\text{S}_3/\text{ZC}$  samples.

**Table S1.** Zn and Co content of ZC and Bi<sub>2</sub>S<sub>3</sub>/ZC samples determined by ICP-OES.

|       | <b>ZC</b> | <b>Bi<sub>2</sub>S<sub>3</sub>/ZC</b> |
|-------|-----------|---------------------------------------|
| %Zn   | 16.96     | 12.37                                 |
| %Co   | 33.88     | 26.15                                 |
| Co/Zn | 2.17      | 2.32                                  |
